# Supplementary material for: The Antiasthma Medication Ciclesonide Suppresses Breast Cancer Stem Cells through Inhibition of the Glucocorticoid Receptor Signaling-Dependent YAP Pathway
Source: Molecules. 2020 Dec 19;25(24):6028. doi: 10.3390/molecules25246028 (PMC7766992; doi:10.3390/molecules25246028)
Supplement: Supplementary file 1 [file molecules-25-06028-s001.pdf]

**Supplementary Table S1.** Specific Real-time RT-qPCR primer sequences containing human *CD44*, *Nanog*, *Sox2*, *Oxt4*, *GR*, *YAP*, *CTGF*, *CYR61*, and  $\beta$ -actin genes

| Genes          | Primers                                                                          |
|----------------|----------------------------------------------------------------------------------|
| CD44           | Forward: 5'-AGAAGGTGTGGGCAGAAGAA-3'<br>Reverse: 5'-AAATGCACCATTTTCCTGAGA-3'      |
| Nanog          | Forward: 5'-ATGCCTCACACGGAGACTGT-3'<br>Reverse: 5'-AAGTGGGTTGTTTGCCTTTG-3'       |
| Sox2           | Forward : 5'-TTGCTGCCTCTTTAAGACTAGGA-3'<br>Reverse : 5'-CTGGGGCTCAAACCTTCTCTC-3' |
| Oct4           | Forward: 5'-AGCAAAACCCGGAGGAGT-3'<br>Reverse: 5'-CCACATCGGCCTGTGTATATC-3'        |
| GR             | Forward:5'-GAAGGAAACTCCAGCCAGAA-3'<br>Reverse:5'-CAGCTAACATCTCGGGGAAT-3'         |
| YAP            | Forward:5'- GAACCCAGATGACTTCCTG-3'<br>Reverse:5'- 5'-CTCCTTCCAGTGTTCCAAGG-3'     |
| CTGF           | Forward: 5'-CCAATGACAACGCCTCCTG-3'<br>Reverse: 5'-TGGTGCAGCCAGAAAGCTC-3'5'-      |
| CYR61          | Forward: 5'-AGCCTCGCATCCTATACAACC3'<br>Reverse: 5'-TTCTTTCACAAGGCGGCACTC3'       |
| $\beta$ -actin | Forward: 5'-TGTTACCAACTGGGACGACA-3'<br>Reverse : 5'-GGGGTGTTGAAGGTCTCAA-3'       |

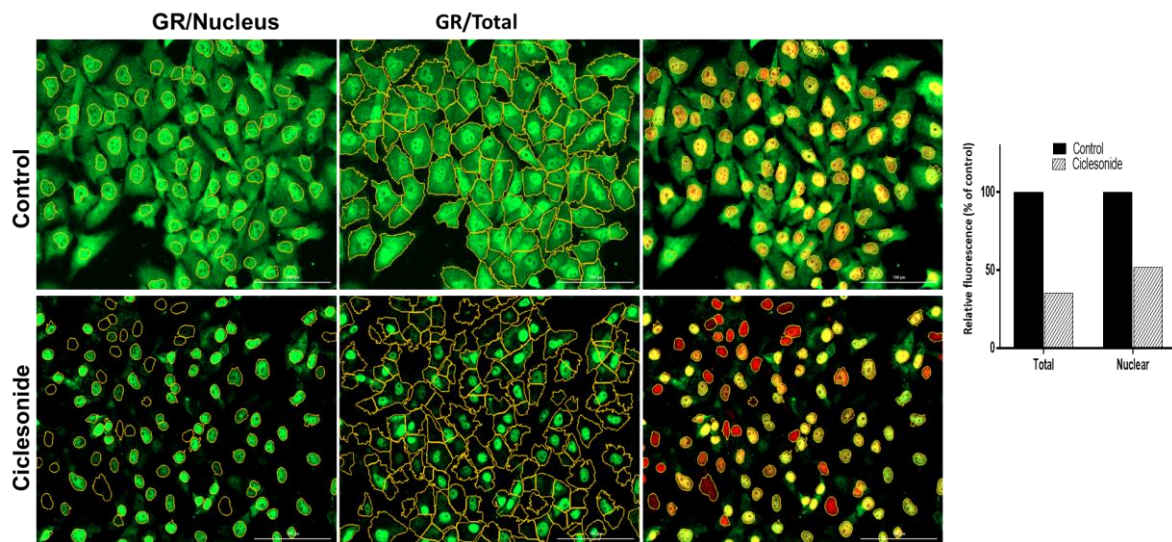

**Supplementary Figure S1.** Ciclesonide reduced the levels of cytosolic and nuclear GR protein (green) in MDA-MB-231 cells, as evidenced by immunofluorescence. Nuclei were stained with DAPI (red), and GR was labeled with an anti-GR antibody (green). Magnification, x100. Total and nuclear fluorescence with/without ciclesonide were determined by using Gen5 cell imaging program of Lionheart FX machine.

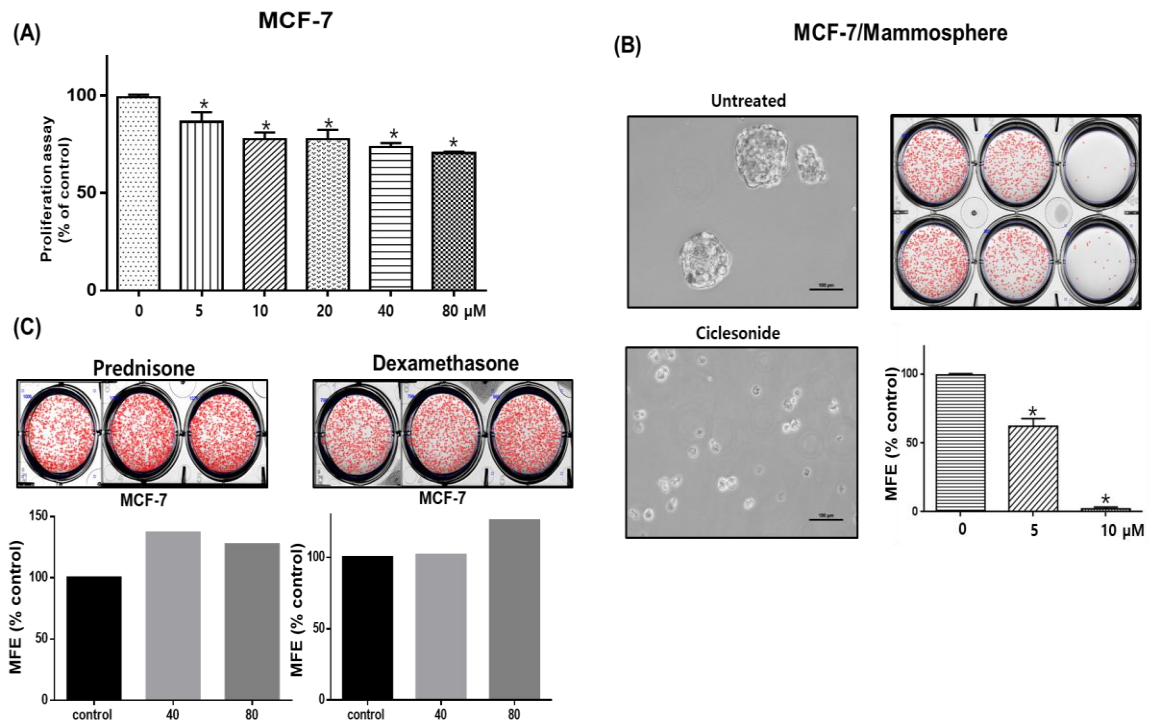

**Supplementary Figure S2.** Ciclesonide reduced the proliferation of MCF-7 cells. (A) MCF-7 cells were cultured in a plate with the ciclesonide. The growth of cancer cells was assessed with MTS reagent. (B) Mammospheres were cultured for 7 days in MammoCult medium. Treatment with ciclesonide (5 and 10  $\mu$ M) reduced mammosphere formation to 5% under control conditions. \* $p < 0.05$  vs. the control. (C) Treatment with prednisone or dexamethasone (40 and 80  $\mu$ M) did not reduce the MFE.
